# Supplementary material for: Association between Compliance with the 24-Hour Movement Guidelines and Fundamental Movement Skills in Preschoolers: A Network Perspective
Source: PubMed Central journal article supplement (PMC7652226; doi:10.3390/ijerph17155443), 2020-07-28
Supplement: ijerph-17-05443-s001.pdf [file ijerph-17-05443-s001.pdf]

Supplementary file

**Table S1.** Weights Matrix.

| Variables | 3 years-old |       |       |       |       |      |      | 4 years-old |       |       |       |       |      |      | 5 years-old |       |       |       |       |      |      |  |
|-----------|-------------|-------|-------|-------|-------|------|------|-------------|-------|-------|-------|-------|------|------|-------------|-------|-------|-------|-------|------|------|--|
|           | 1           | 2     | 3     | 4     | 5     | 6    | 7    | 1           | 2     | 3     | 4     | 5     | 6    | 7    | 1           | 2     | 3     | 4     | 5     | 6    | 7    |  |
| 1         | 0,00        |       |       |       |       |      |      | 0,00        |       |       |       |       |      |      | 0,00        |       |       |       |       |      |      |  |
| 2         | -0,03       | 0,00  |       |       |       |      |      | 0,07        | 0,00  |       |       |       |      |      | 0,08        | 0,00  |       |       |       |      |      |  |
| 3         | -0,06       | 0,07  | 0,00  |       |       |      |      | -0,03       | -0,02 | 0,00  |       |       |      |      | 0,19        | -0,23 | 0,00  |       |       |      |      |  |
| 4         | 0,10        | -0,03 | 0,09  | 0,00  |       |      |      | -0,32       | -0,09 | 0,29  | 0,00  |       |      |      | 0,23        | 0,01  | 0,01  | 0,00  |       |      |      |  |
| 5         | 0,02        | -0,75 | -0,45 | -0,03 | 0,00  |      |      | -0,10       | 0,12  | 0,24  | 0,24  | 0,00  |      |      | 0,13        | -0,17 | 0,26  | 0,47  | 0,00  |      |      |  |
| 6         | -0,24       | 0,43  | -0,29 | 0,04  | -0,37 | 0,00 |      | 0,02        | 0,18  | -0,46 | -0,08 | 0,03  | 0,00 |      | -0,43       | 0,07  | -0,43 | -0,27 | -0,07 | 0,00 |      |  |
| 7         | -0,22       | 0,33  | -0,07 | 0,15  | -0,38 | 0,57 | 0,00 | -0,11       | 0,11  | -0,61 | -0,09 | -0,21 | 0,65 | 0,00 | -0,34       | -0,15 | -0,28 | -0,74 | -0,22 | 0,60 | 0,00 |  |

1= BMI; 2 = TPA+MVPA; 3 = Sleep time; 4 Screen time; 5 = Sex; 6 = Locomotor Skills; 7 = Object control Skills.
